# Supplementary material for: Multiple Aggregation Pathways in Human γS-Crystallin and Its Aggregation-Prone G18V Variant
Source: PubMed Central journal article supplement — Invest Ophthalmol Vis Sci. 2017 Apr;58(4):2397–405. doi: 10.1167/iovs.16-20621 (PMC5407245; doi:10.1167/iovs.16-20621), 2017-04
Supplement: iovs-58-04-16_s01.pdf [file iovs-58-04-16_s01.pdf]

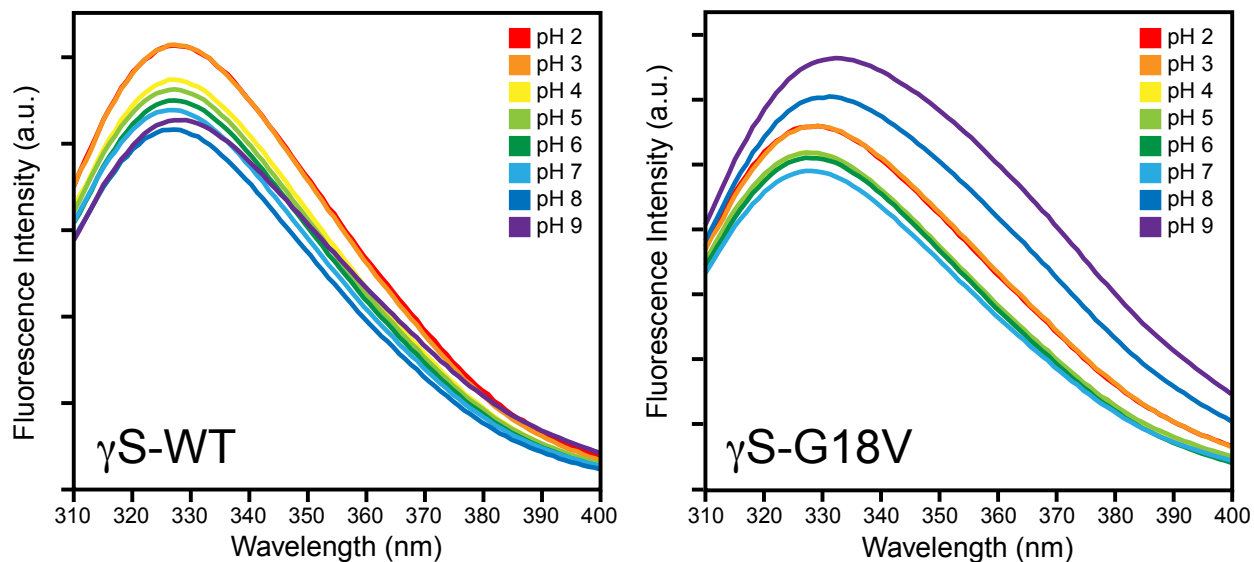

1

2 **Figure S1:** Trp Fluorescence of  $\gamma$ S-WT (left panel) and  $\gamma$ S-G18V (right panel) for a range of pH

3 values. Basic conditions result in both red shifting and reduced fluorescence quenching. The total

4 fluorescence in both proteins decreases from acidic to neutral conditions. The largest red shifting

5 of  $\gamma$ S-G18V Trp fluorescence occurs under basic conditions, while smaller red shifts occur at pH

6 2 and 3. The Trp fluorescence of  $\gamma$ S-G18V is significantly greater at pH 8 and 9 than under any

7 other conditions.

8

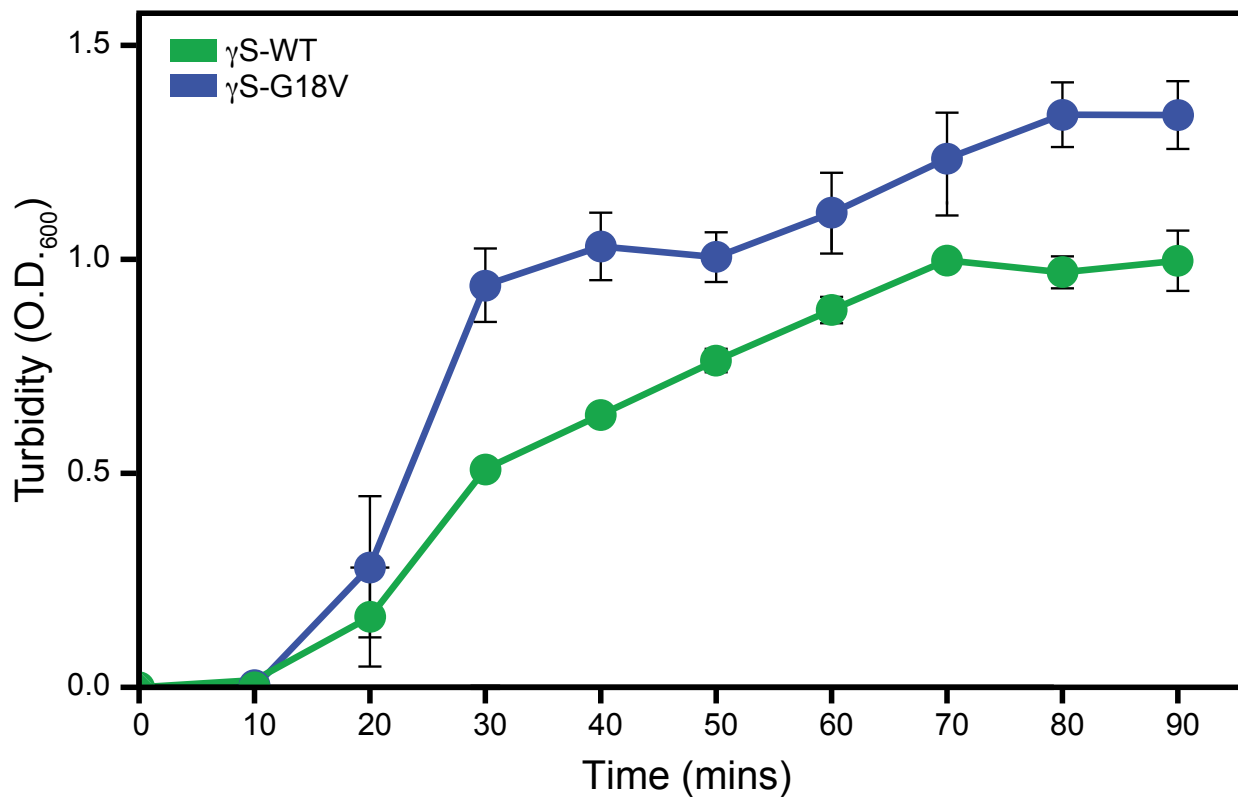

9

10 **Figure S2:** Turbidity measurements for UV-irradiated samples of  $\gamma$ S-WT (green) and  $\gamma$ S-G18V  
11 (blue) (6 mg/mL concentration, pH 7). The solution temperature was held between 22 °C and 24  
12 °C to prevent thermal aggregation.  $\gamma$ S-G18V is consistently more turbid than  $\gamma$ S-WT, with both  
13 proteins displaying the greatest increase aggregation between 10 and 30 minutes of exposure.

14
